# Supplementary material
Source: publisher figshare collection journal article supplement (https://frontiersin.figshare.com/ndownloader/files/23637326)
Supplement: Supplementary file 1 [file 23637326]

Supplementary Material to:

# **Amorphous silica controls water storage capacity and phosphorus mobility in soils**

## **Authors**

*Jörg Schaller<sup>1,2,\*</sup>, Sven Frei<sup>3</sup>, Lisa Rohn<sup>3</sup>, and Benjamin Silas Gilfedder<sup>4</sup>*

## **Affiliations**

<sup>1</sup> Leibniz Center for Agricultural Landscape Research (ZALF), 15374 Müncheberg, Germany

<sup>2</sup> Bayreuth Center of Ecology and Environmental Research (BAYCEER), University of Bayreuth, Germany

<sup>3</sup> Department of Hydrology, Bayreuth Center of Ecology and Environmental Research (BAYCEER), University of Bayreuth, Germany

<sup>4</sup> Limnological Station, Bayreuth Center of Ecology and Environmental Research (BAYCEER), University of Bayreuth, Germany

\*Corresponding author: Email: [Schaller@zalf.de](mailto:Schaller@zalf.de)

20

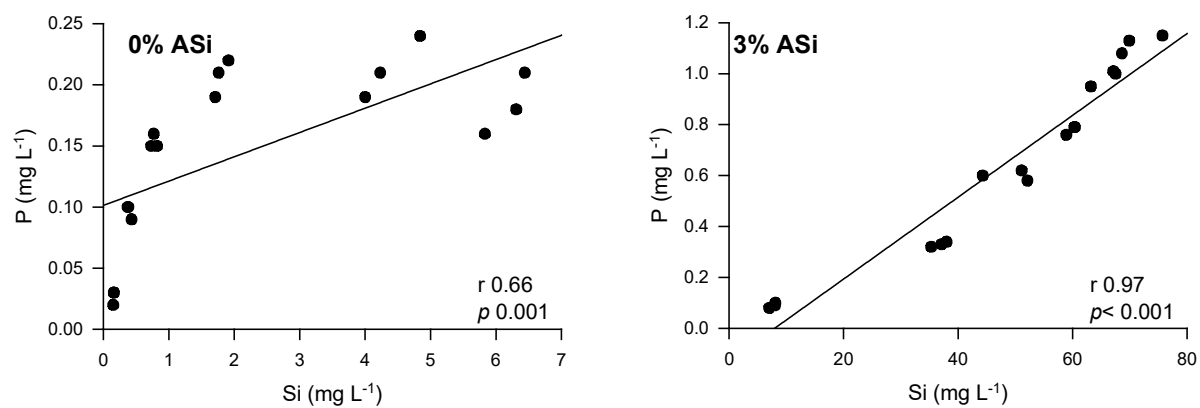

21

22 **Fig. S1. Correlation between P and Si mobilization from soil with different ASi content**  
23 **collected from a mobilization experiment.**

24

25

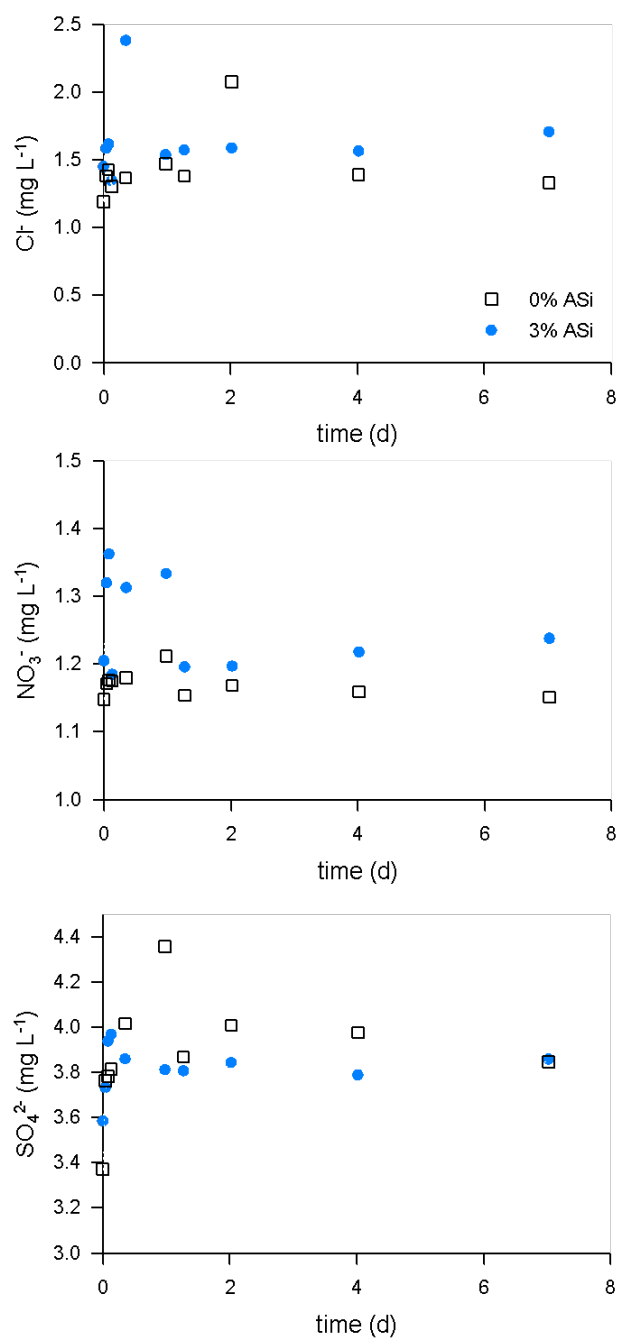

**Fig. S2. Chloride, nitrate and sulfate mobilization from soil with different ASi content collected from a mobilization experiment.**
